# Supplementary material for: Diagnostic Pharmacokinetics: how brain-derived biomarkers distribute through the human body, and how this affects their diagnostic significance - the case of S100B
Source: Research Square preprint supplement (doi:10.21203/rs.3.rs-1277222/v1), 2022-01-19
Supplement: Supplementary file 1 [file 20cfa3a2a1bef54f9286d376.xlsx]

## Sheet: Sheet1
	Quantity Name	Initial Value	Units
	Arterial Blood	2500	milliliter
	S100B	0	nanogram/milliliter
	Brain	1340	milliliter
	S100B	9	nanogram/milliliter
	Kidney	325	milliliter
	S100B	0.25	nanogram/milliliter
	Urine	600	milliliter
	S100B	0	nanogram/milliliter
	Venous Blood	2500	milliliter
	S100B	0	nanogram/milliliter
	Lung	547	milliliter
	S100B	0.37	nanogram/milliliter
	Heart	359	milliliter
	S100B	0.28	nanogram/milliliter
	Bone	3950	milliliter
	S100B	0	nanogram/milliliter
	Adipose Tissue	22700	milliliter
	S100B	0.51325	nanogram/milliliter
	Skin	3150	milliliter
	S100B	0.275	nanogram/milliliter
	Muscle	31300	milliliter
	S100B	0.3	nanogram/milliliter
	Gut	1220	milliliter
	S100B	0.4	nanogram/milliliter
	Lymph	12	liter
	S100B	0	nanogram/milliliter
	Muscle Tissue Vascular Fraction	845.1	milliliter
	S100B	0	nanogram/milliliter
	Gut Tissue Vascular Fraction	61	milliliter
	S100B	0	nanogram/milliliter
	Lung Tissue Vascular Fraction	101.195	milliliter
	S100B	0	nanogram/milliliter
	Heart Tissue Vascular Fraction	15.078	milliliter
	S100B	0.28	nanogram/milliliter
	Bone Tissue Vascular Fraction	197.5	milliliter
	S100B	0	nanogram/milliliter
	Kidney Tissue Vascular Fraction	22.75	milliliter
	S100B	0	nanogram/milliliter
	Skin Tissue Vascular Fraction	157.5	milliliter
	S100B	0	nanogram/milliliter
	Adipose Tissue Vascular Fraction	703.7	milliliter
	S100B	0	nanogram/milliliter
	Brain tissue vascular fraction	67	milliliter
	S100B	0	nanogram/milliliter
	BloodFlowLungToArtery	313980	milliliter/hour
	BloodFlowVenousToLung	313980	milliliter/hour
	BloodFlowArteryToKidney	66000	milliliter/hour
	BBB_Index	0	dimensionless
	GFR	125	milliliter/minute
	BloodFlowArteryToSaliva	0.0001	1/hour
	BloodFlowArteryToVenous	3139	milliliter/hour
	BloodFlowArteryToMuscle	45000	milliliter/hour
	BloodFlowArteryToHeart	9000	milliliter/hour
	BloodFlowHeartToVenous	9000	milliliter/hour
	BloodFlowArterialToBone	15000	milliliter/hour
	BloodFlowBoneToVenous	15000	milliliter/hour
	BloodFlowKidneyToVenous	66000	milliliter/hour
	BloodFlowAdiposeToVenous	15600	milliliter/hour
	BloodFlowArterialToAdipose	15600	milliliter/hour
	BloodFlowSkinToVenous	18000	milliliter/hour
	BloodFlowArterialToSkin	18000	milliliter/hour
	TissueFactor	0.18	dimensionless
	BloodFlowMuscleToVenous	45000	milliliter/hour
	BloodFlowArteryToGut	66000	milliliter/hour
	BloodFlowGutToVenous	66000	milliliter/hour
	LymphFlowMuscle	90	milliliter/hour
	LymphFlowGut	132	milliliter/hour
	LymphFlowHeart	132	milliliter/hour
	LymphFlowAdipose	31.2	milliliter/hour
	LymphFlowSkin	36	milliliter/hour
	LymphFlowKidney	132	milliliter/hour
	LymphFlowToVein	3100	milliliter/hour
	kf_1	1	dimensionless
	BloodFlowLungToArterial	313980	milliliter/hour
	Excretion	0	1/minute
	RenalEliminationFactor	100	dimensionless
	kf_brain	0.015	dimensionless
	AdiposeTissueFactor	1	dimensionless
	PoreRatioMuscle	2000	dimensionless
	PoreRatioAdipose	500	dimensionless
	PoreRatioGut	500	dimensionless
	PoreRatioSkin	500	dimensionless
	PoreRatioLung	45	dimensionless
	PoreRatioKidney	200	dimensionless
	kr_brain	1.5e-06	dimensionless
	kf_muscle	24.4444	dimensionless
	kr_muscle	0.0024444	dimensionless
	kf_gut	104.167	dimensionless
	kr_gut	0.010417	dimensionless
	kf_lung	617.284	dimensionless
	kr_lung	0.061728	dimensionless
	kf_heart	130.208	dimensionless
	kr_heart	0.013021	dimensionless
	kf_bone	797.101	dimensionless
	kr_bone	0.07971	dimensionless
	kf_kidney	135.135	dimensionless
	kr_kidney	0.013514	dimensionless
	kf_skin	66.6667	dimensionless
	kr_skin	0.0066667	dimensionless
	kf_adipose	57.1429	dimensionless
	kr_adipose	0.0057143	dimensionless
	interstitialFlow	1	milliliter/hour
	BloodFlowFromBrain	42000	milliliter/hour
	BloodFlowToBrain	42000	milliliter/hour
