# Supplementary material for: Diagnostic Pharmacokinetics: how brain-derived biomarkers distribute through the human body, and how this affects their diagnostic significance - the case of S100B
Source: Research Square preprint supplement (doi:10.21203/rs.3.rs-1277222/v1), 2022-01-19
Supplement: Supplementary file 2 [file 648d81a1cea0ae62eb546739.xlsx]

## Sheet: Sheet1
	Quantity Name	Initial Value	Units
	Arterial Blood	1.16	liter
	S100B	0	nanogram/milliliter
	Venous Blood	2.33	liter
	S100B	0	nanogram/milliliter
	Central Lymph	12	liter
	S100B	0	nanogram/milliliter
	Brain	1.34	liter
	Vascular Compartment Brain	67	milliliter
	S100B	0	nanogram/milliliter
	Interstitium Brain	130	milliliter
	S100B	10	nanogram/milliliter
	Glia	0.2	liter
	S100B	50	nanogram/milliliter
	Urine	200	milliliter
	S100B	0	nanogram/milliliter
	Kidney	280	milliliter
	S100B	0.25	nanogram/milliliter
	Muscle	31.3	liter
	Interstitium Muscle	2.8	liter
	S100B	0.3	nanogram/milliliter
	Vascular Space Muscle	0.8451	liter
	S100B	0	nanogram/milliliter
	Adipose	22.7	liter
	Interstitium Adipose	3.2	liter
	S100B	0.5	nanogram/milliliter
	Vascular Space Adipose	703.1	milliliter
	S100B	0	nanogram/milliliter
	Gut	1220	milliliter
	Vascular Space Gut	61	milliliter
	S100B	0	nanogram/milliliter
	Interstitium Gut	325	milliliter
	S100B	0.17647	nanogram/milliliter
	Saliva	10	milliliter
	S100B	0	nanogram/milliliter
	ArterialToBrainBloodFlow	42000	milliliter/hour
	BrainToVenousBloodFlow	42000	milliliter/hour
	BBB_Index	0	1/hour
	Trauma_Index	0	1/hour
	Glymphatics	8.4	milliliter/hour
	VenousToArterialBloodFlow	201874	milliliter/hour
	LymphaticToVenous	100	milliliter/hour
	GFR	10	milliliter/hour
	ArterialToKidneyBloodFlow	66000	milliliter/hour
	EliminationFactor	100	1/minute
	KidneyToVenousBloodFlow	66000	milliliter/hour
	ReverseSigmaGut	0.05	1/hour
	ReverseSigmaAdipose	0.05	1/hour
	ReverseSigmaMuscle	0.05	1/hour
	BBB	100	1/minute
	SalivaryBloodFlow	1	milliliter/minute
	EmptyingSaliva	1	dimensionless
	kf	1	dimensionless
	kf_1	1	dimensionless
	SigmaBrainLymphatic	0.1	dimensionless
	TissuePartitionKidney	0.1	1/minute
	ArterialToMuscleBloodFlow	45000	milliliter/hour
	MuscleToVenousBloodFlow	45000	milliliter/hour
	SigmaMuscleInterstitiumVascular	0.05	1/hour
	MuscleLymphFlow	90	milliliter/hour
	SigmaMuscleLymphatic	0.8	dimensionless
	SigmaAdiposeInterstitiumVascular	0.05	1/hour
	ArterialToAdiposeBloodFlow	15600	milliliter/hour
	AdiposeToVenousBloodFlow	15600	milliliter/hour
	SigmaAdiposeLymphatic	0.8	dimensionless
	AdiposeLymphFlow	31.2	milliliter/hour
	GutToVenousBloodFlow	66000	milliliter/hour
	ArterialToGutBloodFlow	66000	milliliter/hour
	SigmaGutInterstitiumVascular	0.05	1/hour
	SigmaGutLymphatic	0.8	dimensionless
	GutLymphFlow	132	milliliter/hour
