# Supplementary material for: Diagnostic Pharmacokinetics: how brain-derived biomarkers distribute through the human body, and how this affects their diagnostic significance - the case of S100B
Source: Research Square preprint supplement (doi:10.21203/rs.3.rs-1277222/v1), 2022-01-19
Supplement: Supplementary file 3 [file 6762c5e6b4c4489ed846c872.xlsx]

## Sheet: Sheet1
	ODEs
	d([Arterial Blood].S100B)/dt = 1/[Arterial Blood]*((BloodFlowLungToArterial*[Lung Tissue Vascular Fraction].S100B*TissueFactor) - (BloodFlowArteryToKidney*[Arterial Blood].S100B) - ([Arterial Blood].S100B*BloodFlowToBrain*BBB_Index) - (BloodFlowArteryToHeart*[Arterial Blood].S100B) - (BloodFlowArterialToBone*[Arterial Blood].S100B) - (BloodFlowArterialToAdipose*[Arterial Blood].S100B) - (BloodFlo…
	d(Brain.S100B)/dt = 1/Brain*(((kf_brain*Brain.S100B-kr_brain*[Brain tissue vascular fraction].S100B)*interstitialFlow*BBB_Index))
	d([Brain tissue vascular fraction].S100B)/dt = 1/[Brain tissue vascular fraction]*(-(BBB_Index*Brain.S100B*BloodFlowFromBrain) + ([Arterial Blood].S100B*BloodFlowToBrain*BBB_Index) - ((kf_brain*Brain.S100B-kr_brain*[Brain tissue vascular fraction].S100B)*interstitialFlow*BBB_Index))
	d(Kidney.S100B)/dt = 1/Kidney*(-((RenalEliminationFactor*(GFR/Kidney)*Kidney.S100B)*Kidney) - (LymphFlowKidney*Kidney.S100B) - ((kf_kidney*Kidney.S100B-kr_kidney*[Kidney Tissue Vascular Fraction].S100B)*interstitialFlow))
	d([Kidney Tissue Vascular Fraction].S100B)/dt = 1/[Kidney Tissue Vascular Fraction]*((BloodFlowArteryToKidney*[Arterial Blood].S100B) - (BloodFlowKidneyToVenous*[Kidney Tissue Vascular Fraction].S100B*TissueFactor) + ((kf_kidney*Kidney.S100B-kr_kidney*[Kidney Tissue Vascular Fraction].S100B)*interstitialFlow))
	d(Urine.S100B)/dt = 1/Urine*(((RenalEliminationFactor*(GFR/Kidney)*Kidney.S100B)*Kidney))
	d([Venous Blood].S100B)/dt = 1/[Venous Blood]*(-(BloodFlowVenousToLung*[Venous Blood].S100B) + (BBB_Index*Brain.S100B*BloodFlowFromBrain) + (BloodFlowHeartToVenous*[Heart Tissue Vascular Fraction].S100B*TissueFactor) + (BloodFlowBoneToVenous*[Bone Tissue Vascular Fraction].S100B*TissueFactor) + (BloodFlowKidneyToVenous*[Kidney Tissue Vascular Fraction].S100B*TissueFactor) + (BloodFlowAdiposeToVen…
	d(Lung.S100B)/dt = 1/Lung*(-((kf_lung*Lung.S100B-kr_lung*[Lung Tissue Vascular Fraction].S100B)*interstitialFlow))
	d([Lung Tissue Vascular Fraction].S100B)/dt = 1/[Lung Tissue Vascular Fraction]*(-(BloodFlowLungToArterial*[Lung Tissue Vascular Fraction].S100B*TissueFactor) + (BloodFlowVenousToLung*[Venous Blood].S100B) + ((kf_lung*Lung.S100B-kr_lung*[Lung Tissue Vascular Fraction].S100B)*interstitialFlow))
	d(Heart.S100B)/dt = 1/Heart*(((kf_heart*Heart.S100B-kr_heart*[Heart Tissue Vascular Fraction].S100B)*interstitialFlow))
	d([Heart Tissue Vascular Fraction].S100B)/dt = 1/[Heart Tissue Vascular Fraction]*((BloodFlowArteryToHeart*[Arterial Blood].S100B) - (BloodFlowHeartToVenous*[Heart Tissue Vascular Fraction].S100B*TissueFactor) - ((kf_heart*Heart.S100B-kr_heart*[Heart Tissue Vascular Fraction].S100B)*interstitialFlow))
	d(Bone.S100B)/dt = 1/Bone*(-((kf_bone*Bone.S100B-kr_bone*[Bone Tissue Vascular Fraction].S100B)*interstitialFlow))
	d([Bone Tissue Vascular Fraction].S100B)/dt = 1/[Bone Tissue Vascular Fraction]*((BloodFlowArterialToBone*[Arterial Blood].S100B) - (BloodFlowBoneToVenous*[Bone Tissue Vascular Fraction].S100B*TissueFactor) + ((kf_bone*Bone.S100B-kr_bone*[Bone Tissue Vascular Fraction].S100B)*interstitialFlow))
	d([Adipose Tissue].S100B)/dt = 1/[Adipose Tissue]*(-(LymphFlowAdipose*[Adipose Tissue].S100B) - ((kf_adipose*[Adipose Tissue].S100B-kr_adipose*[Adipose Tissue Vascular Fraction].S100B)*interstitialFlow))
	d([Adipose Tissue Vascular Fraction].S100B)/dt = 1/[Adipose Tissue Vascular Fraction]*(-(BloodFlowAdiposeToVenous*[Adipose Tissue Vascular Fraction].S100B*AdiposeTissueFactor) + (BloodFlowArterialToAdipose*[Arterial Blood].S100B) + ((kf_adipose*[Adipose Tissue].S100B-kr_adipose*[Adipose Tissue Vascular Fraction].S100B)*interstitialFlow))
	d(Skin.S100B)/dt = 1/Skin*(-(LymphFlowSkin*Skin.S100B) - ((kf_skin*Skin.S100B-kr_skin*[Skin Tissue Vascular Fraction].S100B)*interstitialFlow))
	d([Skin Tissue Vascular Fraction].S100B)/dt = 1/[Skin Tissue Vascular Fraction]*(-(BloodFlowArterialToSkin*[Skin Tissue Vascular Fraction].S100B*TissueFactor) + (BloodFlowArterialToSkin*[Arterial Blood].S100B) + ((kf_skin*Skin.S100B-kr_skin*[Skin Tissue Vascular Fraction].S100B)*interstitialFlow))
	d(Muscle.S100B)/dt = 1/Muscle*(-(LymphFlowMuscle*Muscle.S100B) - ((kf_muscle*Muscle.S100B-kr_muscle*[Muscle Tissue Vascular Fraction].S100B)*interstitialFlow))
	d([Muscle Tissue Vascular Fraction].S100B)/dt = 1/[Muscle Tissue Vascular Fraction]*((BloodFlowArteryToMuscle*[Arterial Blood].S100B) - (BloodFlowMuscleToVenous*Muscle.S100B*TissueFactor) + ((kf_muscle*Muscle.S100B-kr_muscle*[Muscle Tissue Vascular Fraction].S100B)*interstitialFlow))
	d(Gut.S100B)/dt = 1/Gut*(-(LymphFlowGut*Gut.S100B) - ((kf_gut*Gut.S100B-kr_gut*[Gut Tissue Vascular Fraction].S100B)*interstitialFlow))
	d([Gut Tissue Vascular Fraction].S100B)/dt = 1/[Gut Tissue Vascular Fraction]*((BloodFlowArteryToGut*[Arterial Blood].S100B) - (BloodFlowGutToVenous*Gut.S100B*TissueFactor) + ((kf_gut*Gut.S100B-kr_gut*[Gut Tissue Vascular Fraction].S100B)*interstitialFlow))
	d(Lymph.S100B)/dt = 1/Lymph*((LymphFlowMuscle*Muscle.S100B) + (LymphFlowGut*Gut.S100B) + (LymphFlowAdipose*[Adipose Tissue].S100B) + (LymphFlowSkin*Skin.S100B) + (LymphFlowKidney*Kidney.S100B) - (LymphFlowToVein*Lymph.S100B))
