# Supplementary material for: Diagnostic Pharmacokinetics: how brain-derived biomarkers distribute through the human body, and how this affects their diagnostic significance - the case of S100B
Source: Research Square preprint supplement (doi:10.21203/rs.3.rs-1277222/v1), 2022-01-19
Supplement: Supplementary file 4 [file ca05e6056e310b913180af50.xlsx]

## Sheet: Sheet1
	ODEs
	d([Arterial Blood].S100B)/dt = 1/[Arterial Blood]*(-(ArterialToBrainBloodFlow*[Arterial Blood].S100B) + (VenousToArterialBloodFlow*[Venous Blood].S100B) - (ArterialToKidneyBloodFlow*[Arterial Blood].S100B) - (ArterialToMuscleBloodFlow*[Arterial Blood].S100B) - ([Arterial Blood].S100B*ArterialToAdiposeBloodFlow) - ([Arterial Blood].S100B*ArterialToGutBloodFlow) - (SalivaryBloodFlow*[Arterial Blood…
	d([Venous Blood].S100B)/dt = 1/[Venous Blood]*((BrainToVenousBloodFlow*[Vascular Compartment Brain].S100B) - (VenousToArterialBloodFlow*[Venous Blood].S100B) + (LymphaticToVenous*[Central Lymph].S100B) + (KidneyToVenousBloodFlow*Kidney.S100B) + (MuscleToVenousBloodFlow*[Vascular Space Muscle].S100B) + ([Vascular Space Adipose].S100B*AdiposeToVenousBloodFlow) + ([Vascular Space Gut].S100B*GutToVen…
	d([Central Lymph].S100B)/dt = 1/[Central Lymph]*((Glymphatics*[Interstitium Brain].S100B) - (LymphaticToVenous*[Central Lymph].S100B) + (MuscleLymphFlow*[Interstitium Muscle].S100B) + (AdiposeLymphFlow*[Interstitium Adipose].S100B) + (GutLymphFlow*[Interstitium Gut].S100B))
	d([Vascular Compartment Brain].S100B)/dt = 1/[Vascular Compartment Brain]*((ArterialToBrainBloodFlow*[Arterial Blood].S100B) - (BrainToVenousBloodFlow*[Vascular Compartment Brain].S100B) + ((BBB_Index*[Interstitium Brain].S100B)*[Interstitium Brain]))
	d([Interstitium Brain].S100B)/dt = 1/[Interstitium Brain]*(((Trauma_Index*Glia.S100B)*Glia) - (Glymphatics*[Interstitium Brain].S100B) - ((BBB_Index*[Interstitium Brain].S100B)*[Interstitium Brain]))
	d(Urine.S100B)/dt = 1/Urine*(((EliminationFactor*(GFR/Kidney)*Kidney.S100B/TissuePartitionKidney)*Kidney) - (kf*Urine.S100B))
	d(Kidney.S100B)/dt = 1/Kidney*(-((EliminationFactor*(GFR/Kidney)*Kidney.S100B/TissuePartitionKidney)*Kidney) + (ArterialToKidneyBloodFlow*[Arterial Blood].S100B) - (KidneyToVenousBloodFlow*Kidney.S100B))
	d([Interstitium Muscle].S100B)/dt = 1/[Interstitium Muscle]*(-((SigmaMuscleInterstitiumVascular*[Interstitium Muscle].S100B)*[Interstitium Muscle]-(ReverseSigmaMuscle*[Vascular Space Muscle].S100B)*[Vascular Space Muscle]) - (MuscleLymphFlow*[Interstitium Muscle].S100B))
	d([Vascular Space Muscle].S100B)/dt = 1/[Vascular Space Muscle]*((ArterialToMuscleBloodFlow*[Arterial Blood].S100B) - (MuscleToVenousBloodFlow*[Vascular Space Muscle].S100B) + ((SigmaMuscleInterstitiumVascular*[Interstitium Muscle].S100B)*[Interstitium Muscle]-(ReverseSigmaMuscle*[Vascular Space Muscle].S100B)*[Vascular Space Muscle]))
	d([Interstitium Adipose].S100B)/dt = 1/[Interstitium Adipose]*(-((SigmaAdiposeInterstitiumVascular*[Interstitium Adipose].S100B)*[Interstitium Adipose]-(ReverseSigmaAdipose*[Vascular Space Adipose].S100B)*[Vascular Space Adipose]) - (AdiposeLymphFlow*[Interstitium Adipose].S100B))
	d([Vascular Space Adipose].S100B)/dt = 1/[Vascular Space Adipose]*(((SigmaAdiposeInterstitiumVascular*[Interstitium Adipose].S100B)*[Interstitium Adipose]-(ReverseSigmaAdipose*[Vascular Space Adipose].S100B)*[Vascular Space Adipose]) + ([Arterial Blood].S100B*ArterialToAdiposeBloodFlow) - ([Vascular Space Adipose].S100B*AdiposeToVenousBloodFlow))
	d([Vascular Space Gut].S100B)/dt = 1/[Vascular Space Gut]*(-([Vascular Space Gut].S100B*GutToVenousBloodFlow) + ([Arterial Blood].S100B*ArterialToGutBloodFlow) + ((SigmaGutInterstitiumVascular*[Interstitium Gut].S100B)*[Interstitium Gut]-(ReverseSigmaGut*[Vascular Space Gut].S100B)*[Vascular Space Gut]))
	d([Interstitium Gut].S100B)/dt = 1/[Interstitium Gut]*(-((SigmaGutInterstitiumVascular*[Interstitium Gut].S100B)*[Interstitium Gut]-(ReverseSigmaGut*[Vascular Space Gut].S100B)*[Vascular Space Gut]) - (GutLymphFlow*[Interstitium Gut].S100B))
	d(Saliva.S100B)/dt = 1/Saliva*((SalivaryBloodFlow*[Arterial Blood].S100B) - (EmptyingSaliva*Saliva.S100B))
